# Supplementary material
Source: Springer Nature journal article supplement (https://www.springermedizin.de/resource/supplementary/13054_2009_7628_MOESM6_ESM.pdf/9730190)

# survival rate

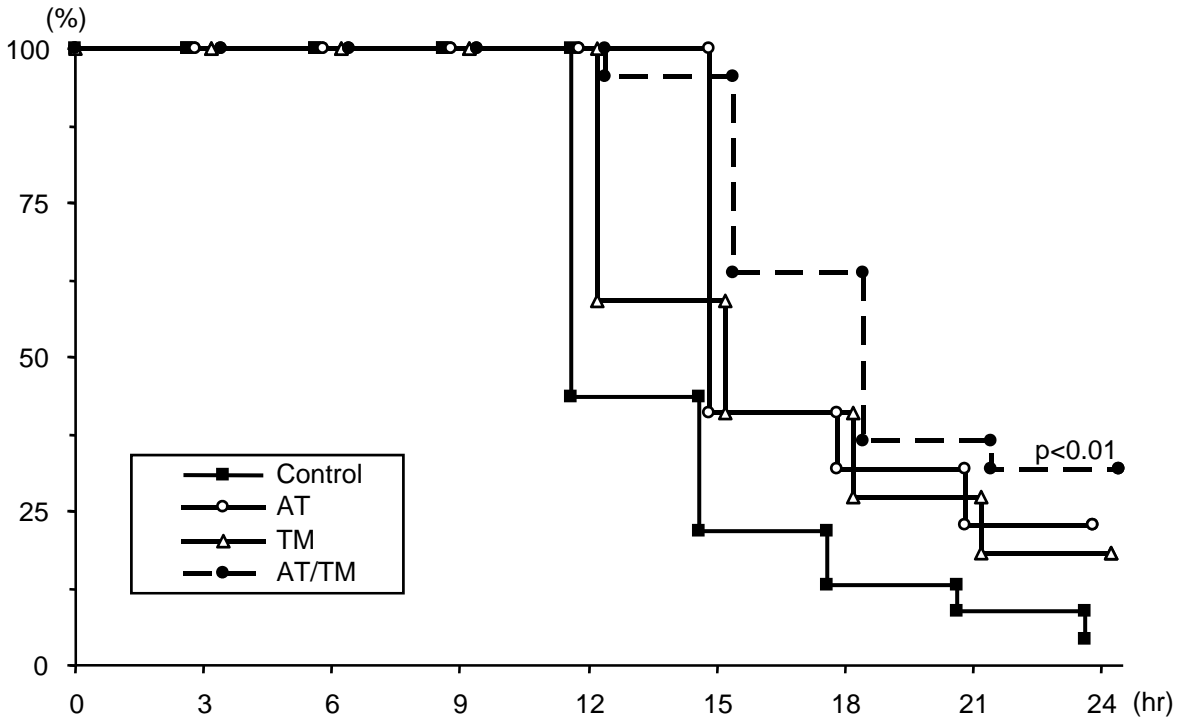

Supplement: MOESM6 [file 9730190]
